# Supplementary material for: Biosynthesis of Circular RNA ciRS-7/CDR1as Is Mediated by Mammalian-Wide Interspersed Repeats (MIRs)
Source: bioRxiv or medRxiv preprint supplement (doi:10.1101/411231), 2019-06-04
Supplement: Supplementary file [file 411231-1.pdf]

## **The functional circular RNA, ciRS-7 (CDR1as), is biosynthesized using back-splicing promoted by inverted msmmsl1sn-wide MIRs but not primate-specific *Alus***

Rei Yoshimoto<sup>1</sup>, Karim Rahimi<sup>2,3</sup>, Karoline K. Ebbesen<sup>2,3</sup>, Thomas Hansen<sup>2</sup>, Jørgen Kjems<sup>2,3</sup>, and Akila Mayeda<sup>1\*</sup>

<sup>1</sup>Division of Gene Expression Mechanism, Institute for Comprehensive Medical Science, Fujita Health University, Toyoake, Aichi, 470-1192, Japan.

<sup>2</sup>Department of Molecular Biology and Genetics, Aarhus University, C.F. Møllers Allé 3, 8000 Aarhus C, Denmark.

<sup>3</sup>Interdisciplinary Nanoscience Center, Aarhus University, Gustav Wieds Vej 14, 8000 Aarhus C, Denmark.

### **Contents**

**Supplemental Figure S1**

**Supplemental Figure S2**

**Supplemental Figure S3**

**Supplemental Figure S4**

**Supplemental Table S1**

\*Correspondence and requests for materials should be addressed to A.M. (email: mayeda@fujita-hu.ac.jp)

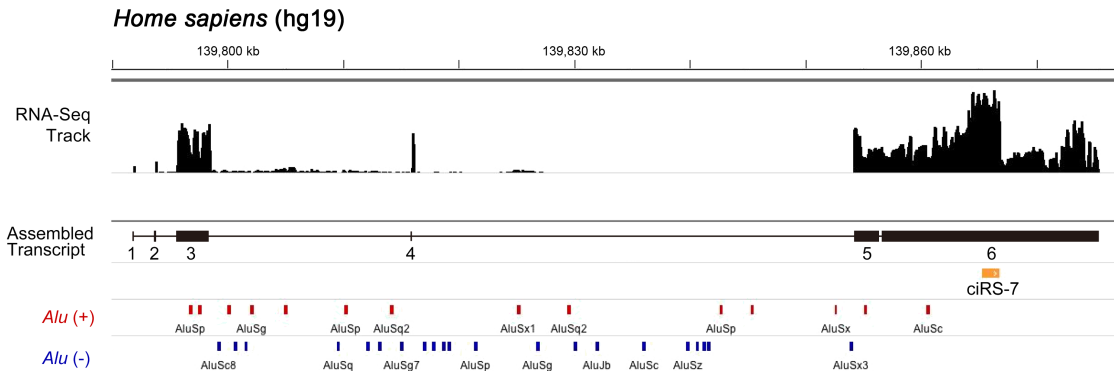

**Figure S1. The ciRS-7 exon does not have flanking inverted *Alu* elements.**

Modified screenshot of human brain RNA-Seq data (GSE59612) mapped on the the human hg19 genome sequence is showing the assembled ciRS-7 precursor transcript. The transcript was assembled by StringTie. The locations of the human *Alu* elements, which were extracted from UCSC Reperat Masker database, are shown by bars (+ is the same strand as the ciRS-7 exon).

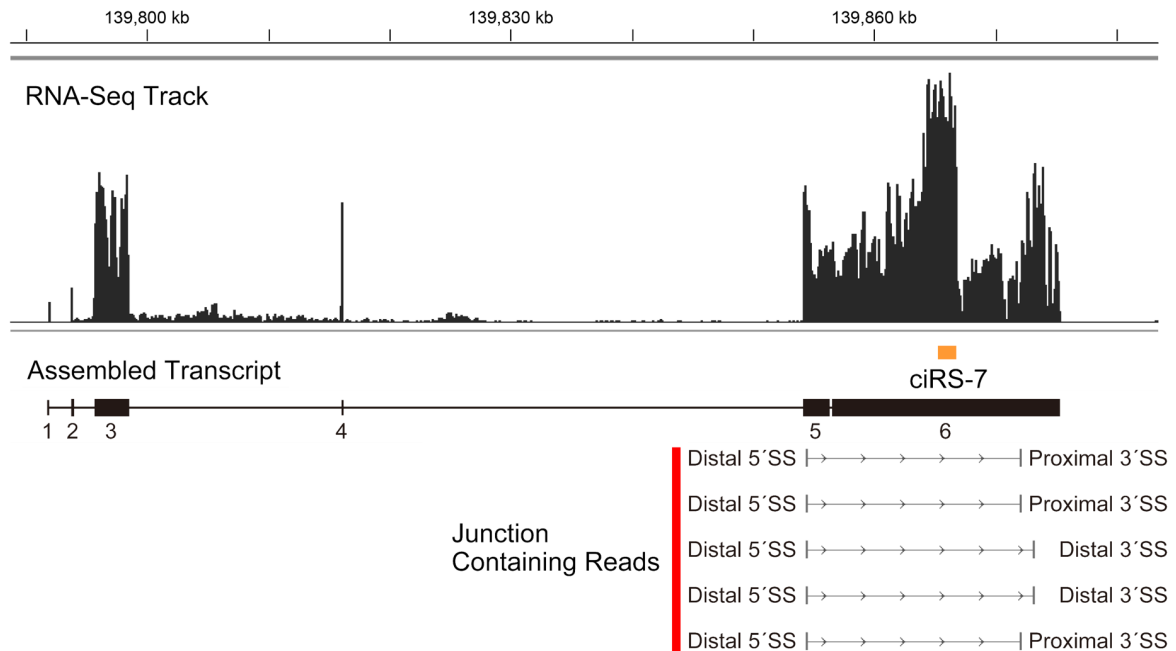

**Figure S2. Alternative splicing events skip the ciRS-7 exon.**

The assembled ciRS-7 precursor tanscript (see Fig. S1) is shown together with the identified alternative splicing events. The junction containing reads revealed the active alternative 5' and 3' splice sites within the exons 5 and 6.

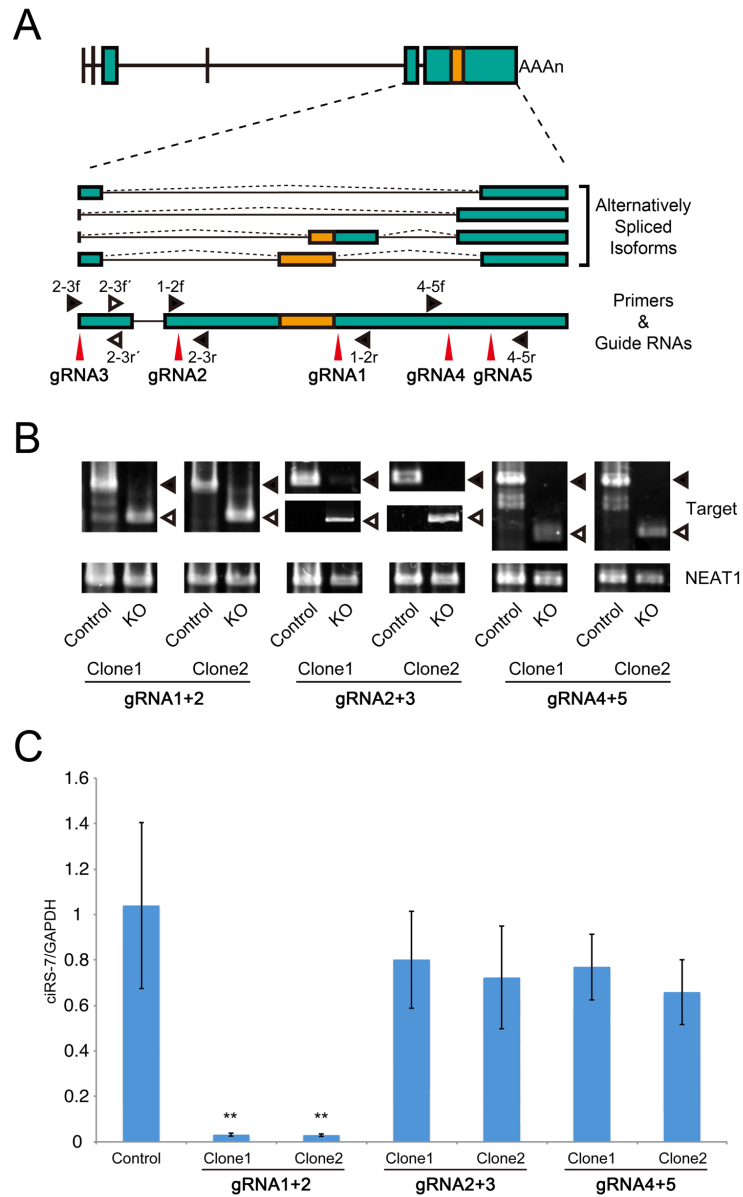

**Figure S3. CRISPR/Cas9-mediated ciRS-7 genomic deletion of the flanking alternative splice sites confirms 'Back-splicing pathway' for ciRS-7 biosynthesis.**

**(A)** Schematic structures of the ciRS-7 precursor and its alternatively spliced isoforms (orange box indicates ciRS-7 exon). The positions of the guide RNAs (gRNA1–gRNA5) targetting the alternative splice sites, and PCR primers for detecting deleted sites (filled triangles) and those for detecting un-deleted sites (open triangles) are also indicated.

**(B)** The targeted ciRS-7 genomic deletions in HEK-293 cells were verified by genomic PCR. The indicated three pairs of gRNAs were used to delete the alternative splice sites. PCR primers indicated in (A) were used for detecting deleted sites (open triangles) and non-deleted sites (filled triangles). PCR primers for the *NEAT1* gene were used as control.

**(C)** The effects of the alternative splice site deletions, described in (A), on ciRS-7 production was analyzed by quantitative RT–PCR with ciRS-7 primers and the control GAPDH primers. The ciRS-7 expression levels were normalized to the control expression level of GAPDH (ciRS-7/GAPDH). The results were plotted as ratios to the value of control wild-type cells. Means ± standard deviation (SD) are given for three independent experiments (\*\*P < 0.01).

## A MIR-dependent circRNAs

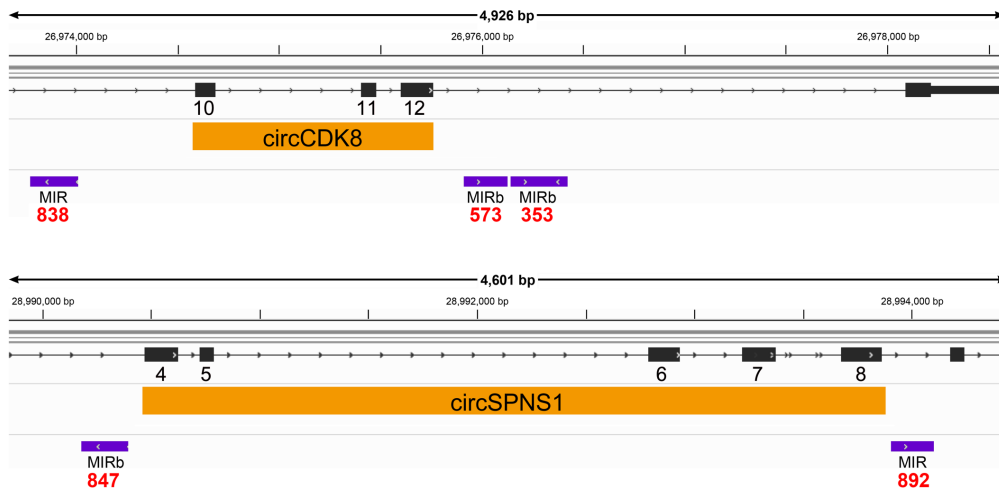

## B MIR-independent circRNAs

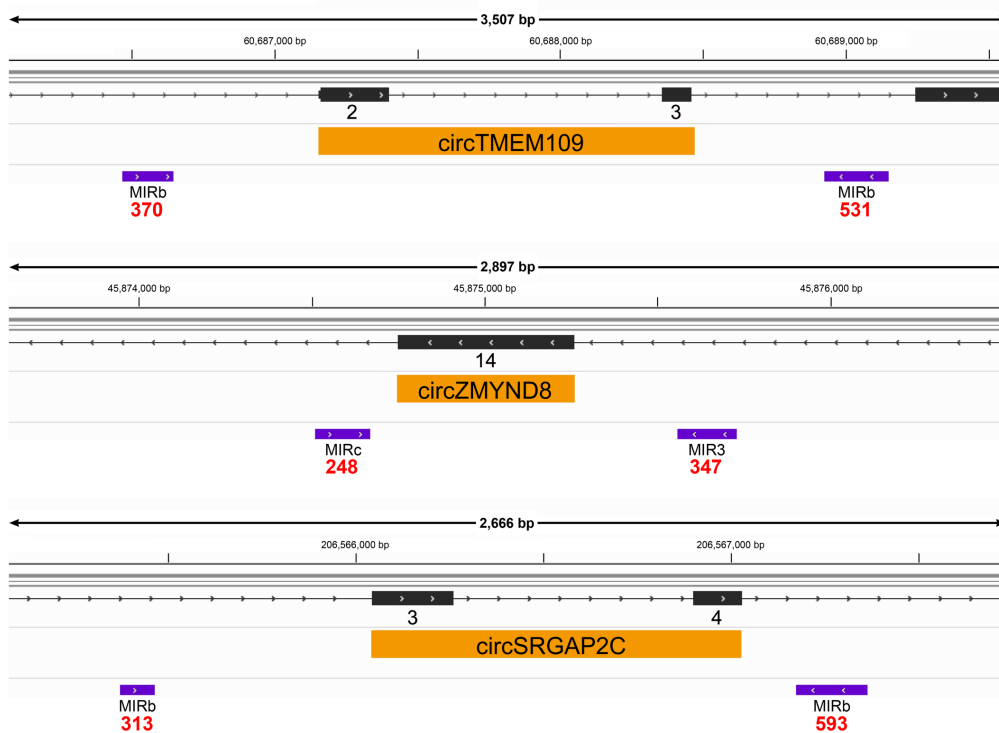

**Figure S4. Identified another human circRNAs revealed different MIR-dependency.**

The loci of two MIR-dependent circRNAs (A) and three MIR-independent circRNAs (B) are shown. The positions of the host genes (with red numbered exons), circRNA exons (in orange), and the identified inverted MIR elements (in purple) are indicated. Red numbers indicate Smith-Waterman (SW) alignment scores of these MIR elements. SW alignment scores of MIRs in MIR-dependent human ciRS-7 (see Fig. 2A) are 945 (upstream) and 1077 (downstream).

Table S1. List of all the synthetic oligonucleotides used in the experiments.

| Primer DNAs for plasmids construction                                                                                     |                                                                |                                                                                       |
|---------------------------------------------------------------------------------------------------------------------------|----------------------------------------------------------------|---------------------------------------------------------------------------------------|
| ciRS-7-5'/BamHI                                                                                                           | 5'-AAAGGATCCACCCCTGGGTATTGGGTTGTGGAGAATCA-3'                   | For pcDNA3-ciRS-7                                                                     |
| ciRS-7-3'/XhoI                                                                                                            | 5'-AAACTCGAGACCTTTGGATCACATCTATCATGATT-3'                      |                                                                                       |
| ciRS-7-Δ5' MIR/BamHI                                                                                                      | 5'-AAAGGATCCATTATTATAACATGAATAAGCATTATGCAA-3'                  | For pcDNA3-ciRS-7ΔMIR                                                                 |
| ciRS-7-Δ3' MIR/XhoI                                                                                                       | 5'-AAACTCGAGCTTTGGTCATGAAGACCAATGATAAAAA-3'                    |                                                                                       |
| circCDK8-5'/BamHI                                                                                                         | 5'-AAAGAATCAATGCAGCTCAGTCCAGCAG-3'                             | For pcDNA3-circCDK8                                                                   |
| circCDK8-3'/XhoI                                                                                                          | 5'-TTTCTCGAGCACTCGGGACCTTATCAGTTT-3'                           |                                                                                       |
| circCDK8-Δ5' MIR-R                                                                                                        | 5'-ATCACACAGCTGTACTTTGTAAGTTGTG-3'                             | For pcDNA3-circCDK8Δ5' MIR                                                            |
| circCDK8-Δ5' MIR -F                                                                                                       | 5'-TCTGGGACTTGATGAAATGGCTTTTCTCT-3'                            |                                                                                       |
| circCDK8-Δ3' MIR-R                                                                                                        | 5'-TGTCAGTACTTTTCCATGCGAGTAACATT-3'                            | For pcDNA3-circCDK8Δ3' MIR                                                            |
| circCDK8-Δ3' MIR-F                                                                                                        | 5'-GCTATTGTTTGGAAACAATGTTTACAGTG-3'                            |                                                                                       |
| circSPNS1-infusion-F                                                                                                      | 5'-TGACGATAAAGGATCCAGGGGTTGCTTATTTTGA-3'                       | For pcDNA3-circSPNS1                                                                  |
| circSPNS1-infusion-R                                                                                                      | 5'-TAGATGCATGCTCGACATCTAATACTAATTAATCCT-3'                     |                                                                                       |
| circSPNS1-Δ5' MIR-F                                                                                                       | 5'-TGACGATAAAGGATCTGGGAGCGGGCTGGTGA-3'                         | For pcDNA3-circSPNS1ΔMIR                                                              |
| circSPNS1-Δ3' MIR-R                                                                                                       | 5'-TAGATGCATGCTCGAGACCACGCCATCCCCT-3'                          |                                                                                       |
| circTMEM109/BamHI                                                                                                         | 5'-AAAGGATCCGAGACAATAACAGCAGAGTTG-3'                           | For pcDNA3-circTMEM109                                                                |
| circTMEM109/XhoI                                                                                                          | 5'-TTTCTCGAGACTTGCAGAAAGTAAGCCG-3'                             |                                                                                       |
| circTMEM109-Δ5' MIR/BamHI                                                                                                 | 5'-AAAGGATCCGAAATGTAGCTTTTATTA-3'                              | For pcDNA3-circTMEM109Δ5,3MIR                                                         |
| circTMEM109-Δ3' MIR/XhoI                                                                                                  | 5'-TTTCTCGAGTGGTGGCGGAAGTCTTTTT-3'                             |                                                                                       |
| circSRGAP2C/BamHI                                                                                                         | 5'-CCAGATCTATCCAGAGGAGAGTCGGTGT-3'                             | For pcDNA3-circSRGAP2C                                                                |
| circSRGAP2C/XhoI                                                                                                          | 5'-TTTCTCGAGATGTCAGGGGAGCTGGATAC-3'                            |                                                                                       |
| circSRGAP2C-Δ5' MIR/BamHI                                                                                                 | 5'-CCAGATCTCAATGTTTATTAAGTGTAGA-3'                             | For pcDNA3-circSRGAP2CΔ5,3MIR                                                         |
| circSRGAP2C-Δ3' MIR/XhoI                                                                                                  | 5'-TTTCTCGAGGATTGTAATCTTTAGTTAA-3'                             |                                                                                       |
| circZMYNDR8/BamHI                                                                                                         | 5'-CGGAATTCGGCCTAGACACAAAGGATCAAG-3'                           | For pcDNA3-circZMYNDR8                                                                |
| circZMYNDR8/XhoI                                                                                                          | 5'-TTTCTCGAGTGGAAAGAAAGCTGTCAGAC-3'                            |                                                                                       |
| circZMYNDR8-Δ5' MIR/BamHI                                                                                                 | 5'-CCAGATCTCAATGTTTATTAAGTGTAGA-3'                             | For pcDNA3-circZMYNDR8Δ5,3MIR                                                         |
| circZMYNDR8-Δ3' MIR/XhoI                                                                                                  | 5'-TTTCTCGAGGGTACATAACTTTGATAGT-3'                             |                                                                                       |
| Primer DNAs for splicing products analysis                                                                                |                                                                |                                                                                       |
| ciRS-7-F(nested)                                                                                                          | 5'-TAAGGATGGCCAGAAAGGAG-3'                                     | For PCR detection of alternatively spliced products from ciRS-7 precursor             |
| ciRS-7-R(nested)                                                                                                          | 5'-GGAACAGTTAGGGATCCCT-3'                                      |                                                                                       |
| ciRS-7-F                                                                                                                  | 5'-TCCGCGCCTTTGAGAGCTTTGGAACGATAT-3'                           |                                                                                       |
| ciRS-7-R                                                                                                                  | 5'-CAGAAACAATGGCAATTATAATAGTTAAAC-3'                           |                                                                                       |
| circSPNS1-F(nested)                                                                                                       | 5'-TGCTCTTCTCTGACAGTCTC-3'                                     | For PCR detection of circSPNS1 cDNA                                                   |
| circSPNS1-R(nested)                                                                                                       | 5'-AAGAGGTCGCAATGAGAGTG-3'                                     |                                                                                       |
| circSPNS1-F                                                                                                               | 5'-GCGGATGTTGGAATAACTG-3'                                      |                                                                                       |
| circSPNS1-R                                                                                                               | 5'-TTCTCTTCTCTGCTCCCTGC-3'                                     |                                                                                       |
| circCDK8-F                                                                                                                | 5'-TGAGAGTTGTTCTCTACACAC-3'                                    | For PCR detection of circCDK8 cDNA                                                    |
| circCDK8-R                                                                                                                | 5'-TCCTGCATAGCCTGTTCTGAG-3'                                    |                                                                                       |
| circTMEM109-F                                                                                                             | 5'-TTCTGTGGCTTCTTTGCTC-3'                                      | For PCR detection of circTMEM109 cDNA                                                 |
| circTMEM109-R                                                                                                             | 5'-AACACATGCTTTCCCATGG-3'                                      |                                                                                       |
| circZMYNDR8-F                                                                                                             | 5'-AGGAACCCAAAGAACCATCTCC-3'                                   | For PCR detection of circZMYNDR8 cDNA                                                 |
| circZMYNDR8-R                                                                                                             | 5'-TTCTCAGAATCCTCGAATCGC-3'                                    |                                                                                       |
| circSRGAP2C-F                                                                                                             | 5'-CAACCAATGCATCTGTCTCAAG-3'                                   | For PCR detection of circSRGAP2C cDNA                                                 |
| circSRGAP2C-R                                                                                                             | 5'-GCTGTCGGCATTGTACATGTG-3'                                    |                                                                                       |
| ciRS-7-F                                                                                                                  | 5'-ACGCTCCAGTGTGCTGA-3'                                        | For PCR detection of ciRS-7 cDNA                                                      |
| ciRS-7-R                                                                                                                  | 5'-GCTGTCGGCATTGTACATGTG-3'                                    |                                                                                       |
| GAPDH-F                                                                                                                   | 5'-AGCCACATCGCTCAGACAC-3'                                      | For PCR detection of GAPDH cDNA                                                       |
| GAPDH-R                                                                                                                   | 5'-GCCCAATACGACCAATCC-3'                                       |                                                                                       |
| pcDNA3 3' UTR-F                                                                                                           | 5'-ATGCATCTAGAGGGCCCTATTCC-3'                                  | For PCR detection of circRNA precursor cDNAs from reporter pDNA3-plasmids             |
| pcDNA3 3' UTR-R                                                                                                           | 5'-AACAAACAGATGGCTGGCAAC-3'                                    |                                                                                       |
| pcDNA5 FRT/TO 3' UTR-F                                                                                                    | 5'-AGTCTAGAGGGCCCGTTAAAC-3'                                    | For PCR detection of circRNA precursor cDNAs from reporter pDNA5-plasmids             |
| pcDNA5 FRT/TO 3' UTR-R                                                                                                    | 5'-TTAGGAAAGGACAGTGGGAGTG-3'                                   |                                                                                       |
| gRNA1-2F                                                                                                                  | 5'-ACTGACTTCTGTCTGCTGTG-3'                                     | For PCR detection of editing & un-editing by gRNA1+2                                  |
| gRNA1-2R                                                                                                                  | 5'-TGCCCTGGATGATAGCAAATGC-3'                                   |                                                                                       |
| gRNA2-3F                                                                                                                  | 5'-TCCTAGATGGTGTGCTTCTCA-3'                                    | For PCR detection of editing by gRNA2+3                                               |
| gRNA2-3R                                                                                                                  | 5'-CAGTCACACAGCTGTAATTG-3'                                     |                                                                                       |
| gRNA2-3F'                                                                                                                 | 5'-ATCGGGGACACACAAAGATC-3'                                     | For PCR detection of un-editing by gRNA2+3                                            |
| gRNA2-3R'                                                                                                                 | 5'-TGCCATTGCTCTCAATCGTC-3'                                     |                                                                                       |
| gRNA4-5F                                                                                                                  | 5'-TTTCTGCTCTGTAGAAAGTCA-3'                                    | For PCR detection of editing & un-editing by gRNA4+5                                  |
| gRNA4-5R                                                                                                                  | 5'-TCAGCTGTGATGATGCCAGA-3'                                     |                                                                                       |
| Antisense 2'-O-Me RNAs for blocking alternative splice sites (*:phosphothiorate backbone, mN: 2'-O-methyl oxynucleotides) |                                                                |                                                                                       |
| GFP-ASO                                                                                                                   | 5'-mG*mC*mA*mC*mC*mA*mU*mC*mU*mC*mU*mC*mA*mA*mG*mG*mA-3'       | For off-target negative control                                                       |
| ciRS-7-ASO1                                                                                                               | 5'-mA*mU*mC*mG*mG*mA*mA*mC*mC*mC*mU*mG*mA*mC*mA*mU*mG-3'       | For 3' splice site of ciRS-7 exon                                                     |
| ciRS-7-ASO2                                                                                                               | 5'-mG*mU*mU*mA*mG*mA*mU*mA*mC*mC*mU*mG*mG*mA*mU*mU*mU*mG-3'    | For 5' splice site of ciRS-7 exon                                                     |
| ciRS-7-ASO3                                                                                                               | 5'-mA*mA*mA*mG*mG*mC*mU*mA*mA*mC*mC*mA*mG*mU*mU*mU*mU*mG-3'    | For prox. alternative 5' splice site                                                  |
| ciRS-7-ASO4                                                                                                               | 5'-mU*mA*mC*mC*mA*mA*mU*mG*mU*mG*mC*mU*mA*mA*mA*mG*mA*mA-3'    | For dist. alternative 3' splice site                                                  |
| ciRS-7-ASO5                                                                                                               | 5'-mG*mU*mC*mU*mU*mC*mU*mC*mA*mC*mA*mG*mA*mG*mA*mG*mU*mA*mG-3' | For dist. alternative 5' splice site                                                  |
| ciRS-7-ASO6                                                                                                               | 5'-mA*mU*mC*mC*mA*mG*mA*mG*mA*mU*mC*mU*mA*mC*mA*mA*mU*mU-mA-3' | For prox. alternative 3' splice site                                                  |
| Guide RNAs for editing alternative splice sites                                                                           |                                                                |                                                                                       |
| gRNA1                                                                                                                     | 5'TACTGTTGGTTCATAAGAT-3'                                       | For positive control (gRNA1+2) & for deletion of alternative 5' splice site (gRNA2+3) |
| gRNA2                                                                                                                     | 5'-CTCCACAACCAATAACCCA-3'                                      |                                                                                       |
| gRNA3                                                                                                                     | 5'-AAGGTCAGGCTATACGCTG-3'                                      |                                                                                       |
| gRNA4                                                                                                                     | 5'-TTTGAGCTAAATTGCC-3'                                         | For deletion of alternative 3' splice site (gRNA4+5)                                  |
| gRNA5                                                                                                                     | 5'-AACATCAATCTGCATTG-3'                                        |                                                                                       |
